# Supplementary material for: Depressing the hydrogenation and decomposition reaction in H2O2 synthesis by supporting AuPd on oxygen functionalized carbon nanofibers
Source: Royal Society of Chemistry journal article supplement (doi:10.1039/c5cy01880c), 2015-12-03
Supplement: c5cy01880c1.pdf [file c5cy01880c1.pdf]

# Depressing the hydrogenation and decomposition reaction in H<sub>2</sub>O<sub>2</sub> synthesis by supporting gold- palladium nanoparticles on oxygen functionalized carbon nanofibers

## Supporting Information

### 1. Experimental

#### 1.1. Catalyst preparation

##### 1.1.1 Carbon nanofibers functionalization

Commercial CNFs were supplied from Applied Science. CNFs consists of tubular fibers with an average diameter of 80 nm and a specific surface area of 40 m<sup>2</sup>/g. The oxygen-containing carbon nanofibers were obtained by treating the pristine CNFs with HNO<sub>3</sub> using the following procedure. A solution of CNFs in HNO<sub>3</sub> concentrate (10 g of CNF per liter of HNO<sub>3</sub>) was kept at 353 K for 2 h under continuous stirring, then rinsed with distilled water, and finally dried at 373 K for several hours. The oxygen functionalized CNFs was labeled as O-CNFs.

##### 1.1.2 Pd catalyst preparation

Solid Na<sub>2</sub>PdCl<sub>4</sub>•2H<sub>2</sub>O (Aldrich, 99.99% purity) (0.189 mmol) and PVA (87–89% hydrolysed (M.W. 13,000–23,000) from Aldrich) (1%wt) solution (Pd/PVA 1/0.5 wt%) were added to 100 mL of H<sub>2</sub>O. After 5 min, NaBH<sub>4</sub> (purity >96% from Fluka) (0.1 M) solution (Pd/NaBH<sub>4</sub> 1/8 mol/mol)

was added to the brown solution under vigorous magnetic stirring. Within a few minutes of sol generation, the colloid was immobilized by adding the support under vigorous stirring. The amount of support was calculated as having a total final metal loading of 1 wt.%. After 2 h the slurry was filtered, the catalyst washed thoroughly with distilled water (neutral mother liquors) to remove PVA, and products deriving from the synthesis (Na, Cl) and dried at 80 °C for 4 h.

### 1.1.3 AuPd catalyst preparation

NaAuCl<sub>4</sub>·2H<sub>2</sub>O (Aldrich, 99.99% purity) (0.074 mmol) was dissolved in 70 mL of H<sub>2</sub>O and PVA (1% w/w) was added (Au/PVA 1/0.5 wt%). The yellow solution was stirred for 3 min and 0.1 M NaBH<sub>4</sub> (Au/NaBH<sub>4</sub> 1/4 mol/mol) was added under vigorous magnetic stirring. Within a few minutes of sol generation, the gold sol was immobilized by adding the support under vigorous stirring. The amount of support was calculated as having a gold loading of 0.73% wt. After 2 h the slurry was filtered, the catalyst washed thoroughly with distilled water (neutral mother liquors). The Au/CNFs was then dispersed in 70 ml of water; Na<sub>2</sub>PdCl<sub>4</sub> (0.051 mmol) and PVA (1%wt) solution (Pd/PVA 1/0.5 wt%) were added. H<sub>2</sub> was bubbled (50 mL/min) under atmospheric pressure and room temperature for 2 h. After additional 18 h, the slurry was filtered, the catalyst thoroughly washed with distilled water. The total metal loading was 1%wt.

### 1.3. Catalyst testing

Catalyst testing was performed using a stainless steel autoclave (Parr Instruments) with a nominal volume of 100 ml and a maximum working pressure of 17.4 MPa. The autoclave was equipped with an overhead stirrer (0–2000 rpm) and provision for measurement of temperature and pressure. For the standard reaction conditions we have employed previously, the autoclave was charged with the catalyst (10 mg), solvent (5.6 g MeOH and 2.9 g H<sub>2</sub>O, both HPLC grade), purged three times with 5% H<sub>2</sub>/CO<sub>2</sub> (0.7 MPa) and then filled with 5% H<sub>2</sub>/CO<sub>2</sub> and 25% O<sub>2</sub>/CO<sub>2</sub> to give a hydrogen to oxygen ratio of 1:2 at a total pressure of 4.0 MPa. Stirring (1200 rpm) was commenced on reaching the desired temperature (2 °C), and experiments were carried out for 30 min. H<sub>2</sub>O<sub>2</sub> yield was determined by titration of aliquots of the final filtered solution with acidified Ce(SO<sub>4</sub>)<sub>2</sub>. Ce(SO<sub>4</sub>)<sub>2</sub> solutions were standardized against (NH<sub>4</sub>)<sub>2</sub>Fe(SO<sub>4</sub>)<sub>2</sub>·6H<sub>2</sub>O using ferroin as indicator. Based on multiple analyses and experiments the experimental error associated with these measurements was of the order of ca. 1–2%.

Hydrogenation experiments were carried out as outlined above, but in the absence of 25% O<sub>2</sub>/CO<sub>2</sub> in the gas stream and in the presence of 4 wt% H<sub>2</sub>O<sub>2</sub> in the solvent (5.6 g methanol, 2.22 g H<sub>2</sub>O, 0.68 g 50% H<sub>2</sub>O<sub>2</sub>) and the catalyst (10mg).

Decomposition experiments were carried out as outlined above, in air and atmospheric pressure and in the presence of 4 wt% H<sub>2</sub>O<sub>2</sub> in the solvent (5.6 g methanol, 2.22 g H<sub>2</sub>O, 0.68 g 50% H<sub>2</sub>O<sub>2</sub>) and the catalyst (10 mg).

#### 1.4. Characterization

- a) The metal content was checked by ICP analysis of the filtrate on a Jobin Yvon JY24.
- b) Morphology and microstructures of the catalysts were characterized by transmission electron microscopy (TEM). The powder samples of the catalysts were ultrasonically dispersed in ethanol and mounted onto copper grids covered with holey carbon film. A Philips CM200 FEG electron microscope, operating at 200 kV and equipped with EDX DX4 analyzer system and a FEI Titan 80-300 electron microscope, operating at 300 kV and equipped with EDX SUTW detector were used for TEM observation.
- c) X-ray photoelectron spectroscopy (XPS) data were collected using a PHI 3056 XPS with an Al anode source operated at 15kV and an applied power of 350W. The energy scale calibration of the instrument is checked using a sputter cleaned piece of Ag. Samples were manually pressed between two pieces of indium foil; the piece of In foil with the sample on it was then mounted to the sample holder with a piece of carbon tape (Nisshin E.M. Co. LTD). Indium was used as a support since the most intense C1s binding energy, from the support material, overlapped with the C signal from the tape. The lowest C1s BE was always measured around 248.8 eV, but the peaks were shifted to 284.8 eV for comparison to literature values. There were no treatments (i.e. cleaning, heating, processing) to the samples before the XPS measurements. High resolution scans were acquired with a 23.5 eV pass energy and 0.05 eV steps a minimum of 50 times; survey scans were measured with a 93.9 eV pass energy and 0.5 eV energy steps a minimum of 25 times. Surface concentrations are calculated by integrating the peaks area and using standard atomic sensitivity factors supplied by the equipment manufacturer. The spectra were deconvoluted using Gaussian-Lorentzian functions and a Shirley-type background.
- d) Surface area, pore size and pore volume were determined by low temperature N<sub>2</sub> adsorption using a SA3100 Coulter apparatus. Before measurement, samples were outgassed at 80°C for 3 h.



Figure S1 Pd and AuPd particle size and distribution

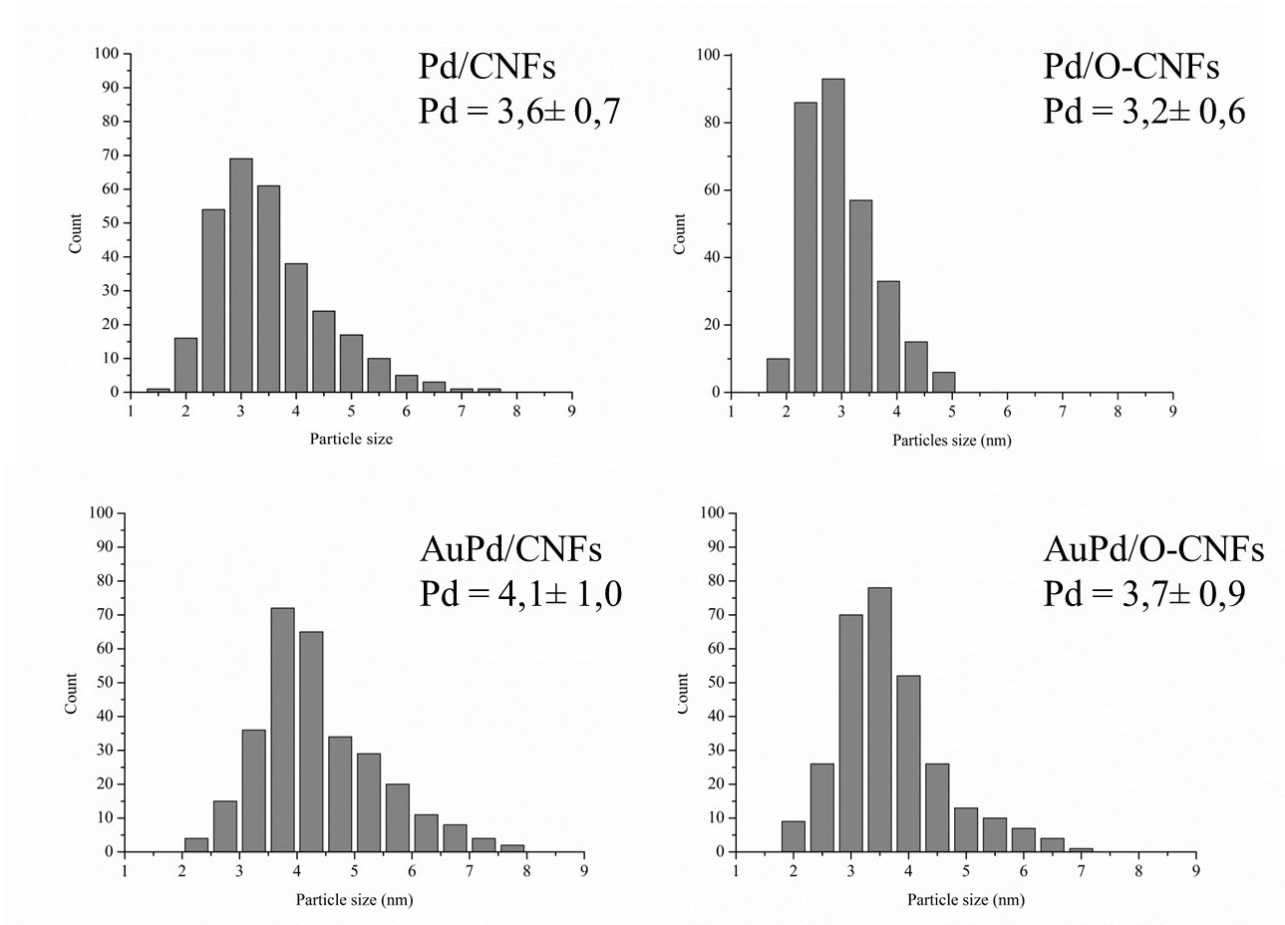

Figure S2 Representative HRTEM image of AuPd nanoparticles

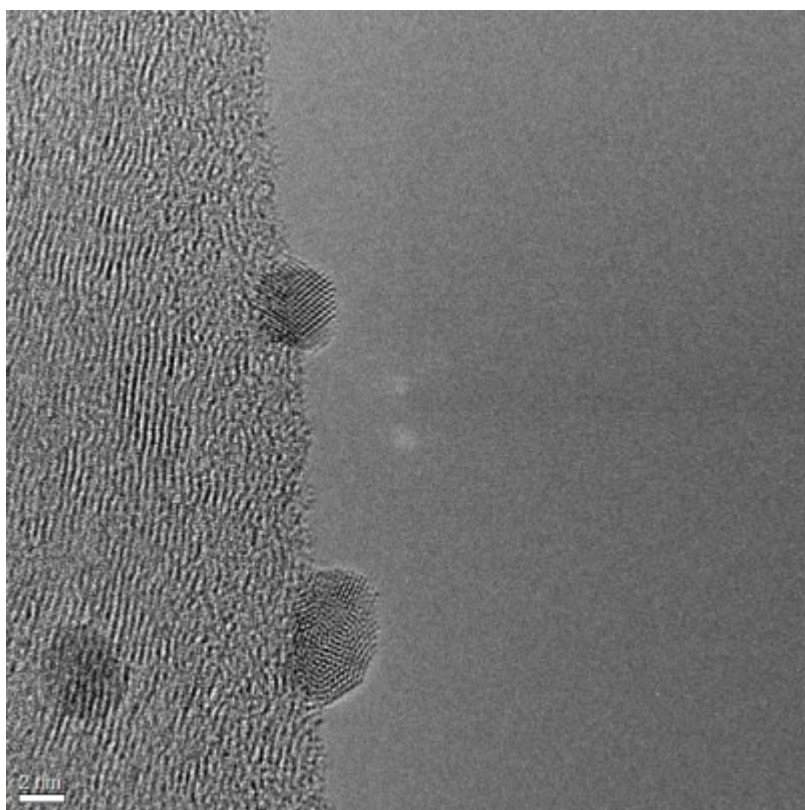

Table S1 Textural properties of CNFs based catalysts

| Catalyst  | Surface area<br>(m <sup>2</sup> /g) | Pore volume<br>(cm <sup>3</sup> /g) |
|-----------|-------------------------------------|-------------------------------------|
| CNFs      | 40                                  | 5.12                                |
| O-CNFs    | 38                                  | 5.21                                |
| AuPd/CNFs | 39                                  | 5.10                                |
| AuPd/CNFs | 36                                  | 5.16                                |

Table S2 Additional XPS results of CNF based catalysts

| Sample | C1s      |        |        |        |                  |        | O1s    |        |        |
|--------|----------|--------|--------|--------|------------------|--------|--------|--------|--------|
|        | C-C, C-H | C-O    | C=O    | O-C=O  | -CO <sub>3</sub> | C6     | C=O    | C-O    | C-O-C  |
| CNF    | 284.79   | 28610  | 287.19 | 288.75 | 290.30           | 291.68 | 530.82 | 532.96 | 534.99 |
| %      | 52.4     | 18.1   | 16.7   | 6.1    | 4.8              | 1.9    | 7.8    | 62.2   | 24.1   |
| O-CNF  | 284.78   | 286.01 | 287.10 | 288.77 | 290.40           | 292.13 | 530.82 | 532.98 | 535.05 |
| %      | 48.7     | 17.9   | 17.5   | 9.1    | 4.9              | 1.9    | 33.8   | 46.5   | 20.9   |

| Sample     | O1s    |        |        |
|------------|--------|--------|--------|
|            | C=O    | C-O    | C-O-C  |
| Pd/O-CNF   | 530.80 | 532.06 | 533.80 |
| %          | 35.8   | 43.6   | 21.3   |
| AuPd/O-CNF | 531.09 | 532.49 | 534.47 |
| %          | 36.5   | 47.1   | 16.2   |



Table S3 Comparison of AuPd supported on different carbon materials for H<sub>2</sub>O<sub>2</sub> synthesis

| Catalyst <sup>a</sup>                                                                       | Productivity<br>[Mol H <sub>2</sub> O <sub>2</sub><br>kg <sub>cat</sub> <sup>-1</sup> h <sup>-1</sup> ] | Productivity<br>[Mol H <sub>2</sub> O <sub>2</sub><br>mol <sub>metal</sub> <sup>-1</sup> h <sup>-1</sup> ] | Ref       |
|---------------------------------------------------------------------------------------------|---------------------------------------------------------------------------------------------------------|------------------------------------------------------------------------------------------------------------|-----------|
| 1% Au <sub>6</sub> Pd <sub>4</sub> /CNFs                                                    | 12 <sup>a</sup>                                                                                         | 200 <sup>a</sup>                                                                                           | This work |
| 1% Au <sub>6</sub> Pd <sub>4</sub> /CNFs<br><i>treated with HNO<sub>3</sub></i>             | 18 <sup>a</sup>                                                                                         | 284 <sup>a</sup>                                                                                           | This work |
| 5% Au <sub>1</sub> Pd <sub>1</sub> /AC (Aldrich G60)                                        | 110 <sup>a</sup>                                                                                        | 359 <sup>a</sup>                                                                                           | 11        |
| 5% Au <sub>1</sub> Pd <sub>1</sub> /AC (Aldrich G60)<br><i>treated with HNO<sub>3</sub></i> | 160 <sup>a</sup>                                                                                        | 503 <sup>a</sup>                                                                                           | 11        |
| 5% Au <sub>1</sub> Pd <sub>1</sub> /CMK-3                                                   | 400 <sup>b</sup>                                                                                        | 1214 <sup>b</sup>                                                                                          | 19        |
| 5% Au <sub>1</sub> Pd <sub>1</sub> /CMK-3<br><i>treated with HNO<sub>3</sub></i>            | 853 <sup>b</sup>                                                                                        | 2589 <sup>b</sup>                                                                                          | 19        |
| 5% Au <sub>1</sub> Pd <sub>1</sub> /AC (Norit)                                              | 293 <sup>b</sup>                                                                                        | 890 <sup>b</sup>                                                                                           | 19        |
| 5% Au <sub>1</sub> Pd <sub>1</sub> /AC (Norit)<br><i>treated with HNO<sub>3</sub></i>       | 507 <sup>b</sup>                                                                                        | 1537 <sup>b</sup>                                                                                          | 19        |

Reaction conditions:

- a) 5% H<sub>2</sub>/CO<sub>2</sub> (2.9 MPa) and 25% O<sub>2</sub>/CO<sub>2</sub> (1.1 MPa), 8.5 g of solvent (2.9 g of water, 5.6 g of MeOH), 0.01 g catalyst, 2 °C, 30 min.
- b) H<sub>2</sub>/O<sub>2</sub>/Ar (5/10/85%) (2 MPa) (75 ml MeOH, 0.04 M HCl), 0.075g catalyst, 5°C, 60 min.

## References

11. J. K. Edwards, B. Solsona, E. N. Ntainjua, A. F. Carley, A. A. Herzing, C. J. Kiley, G. J. Hutchings, *Science*, 2009, 323, 1037.
19. T. Garcia, R. Murillo, S. Agouram, A. Dejoz, M. J. Lazaro, L. Torrente-Murciano, B. Solsona, *Chem. Commun.*, 2012, **48**, 5316.
